# Supplementary figures and images for: Chitosan improves stability of carbon nanotube biocathodes for glucose biofuel cells
Source: Royal Society of Chemistry journal article supplement (doi:10.1039/c4cc04862h), 2014-01-01

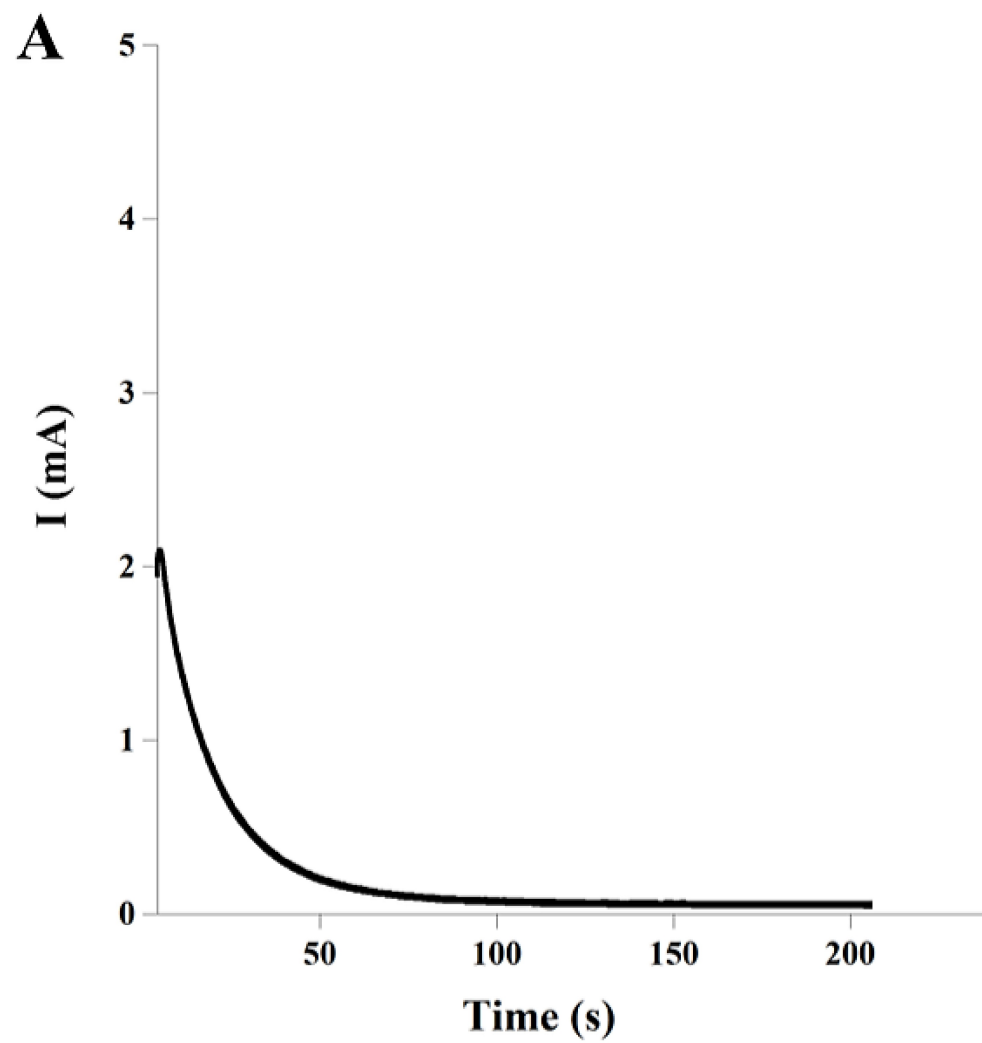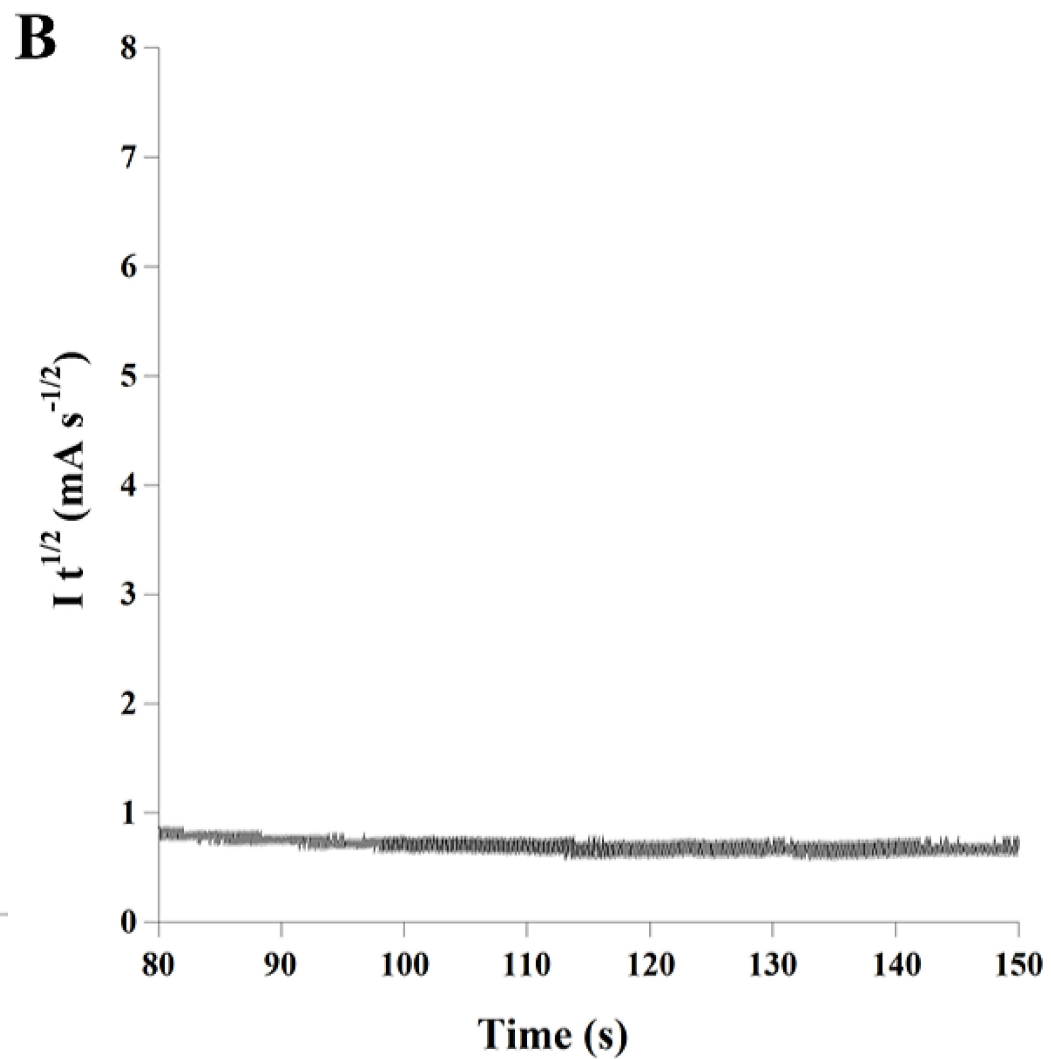

Supplement: c4cc04862h5.pdf [file c4cc04862h5.pdf]

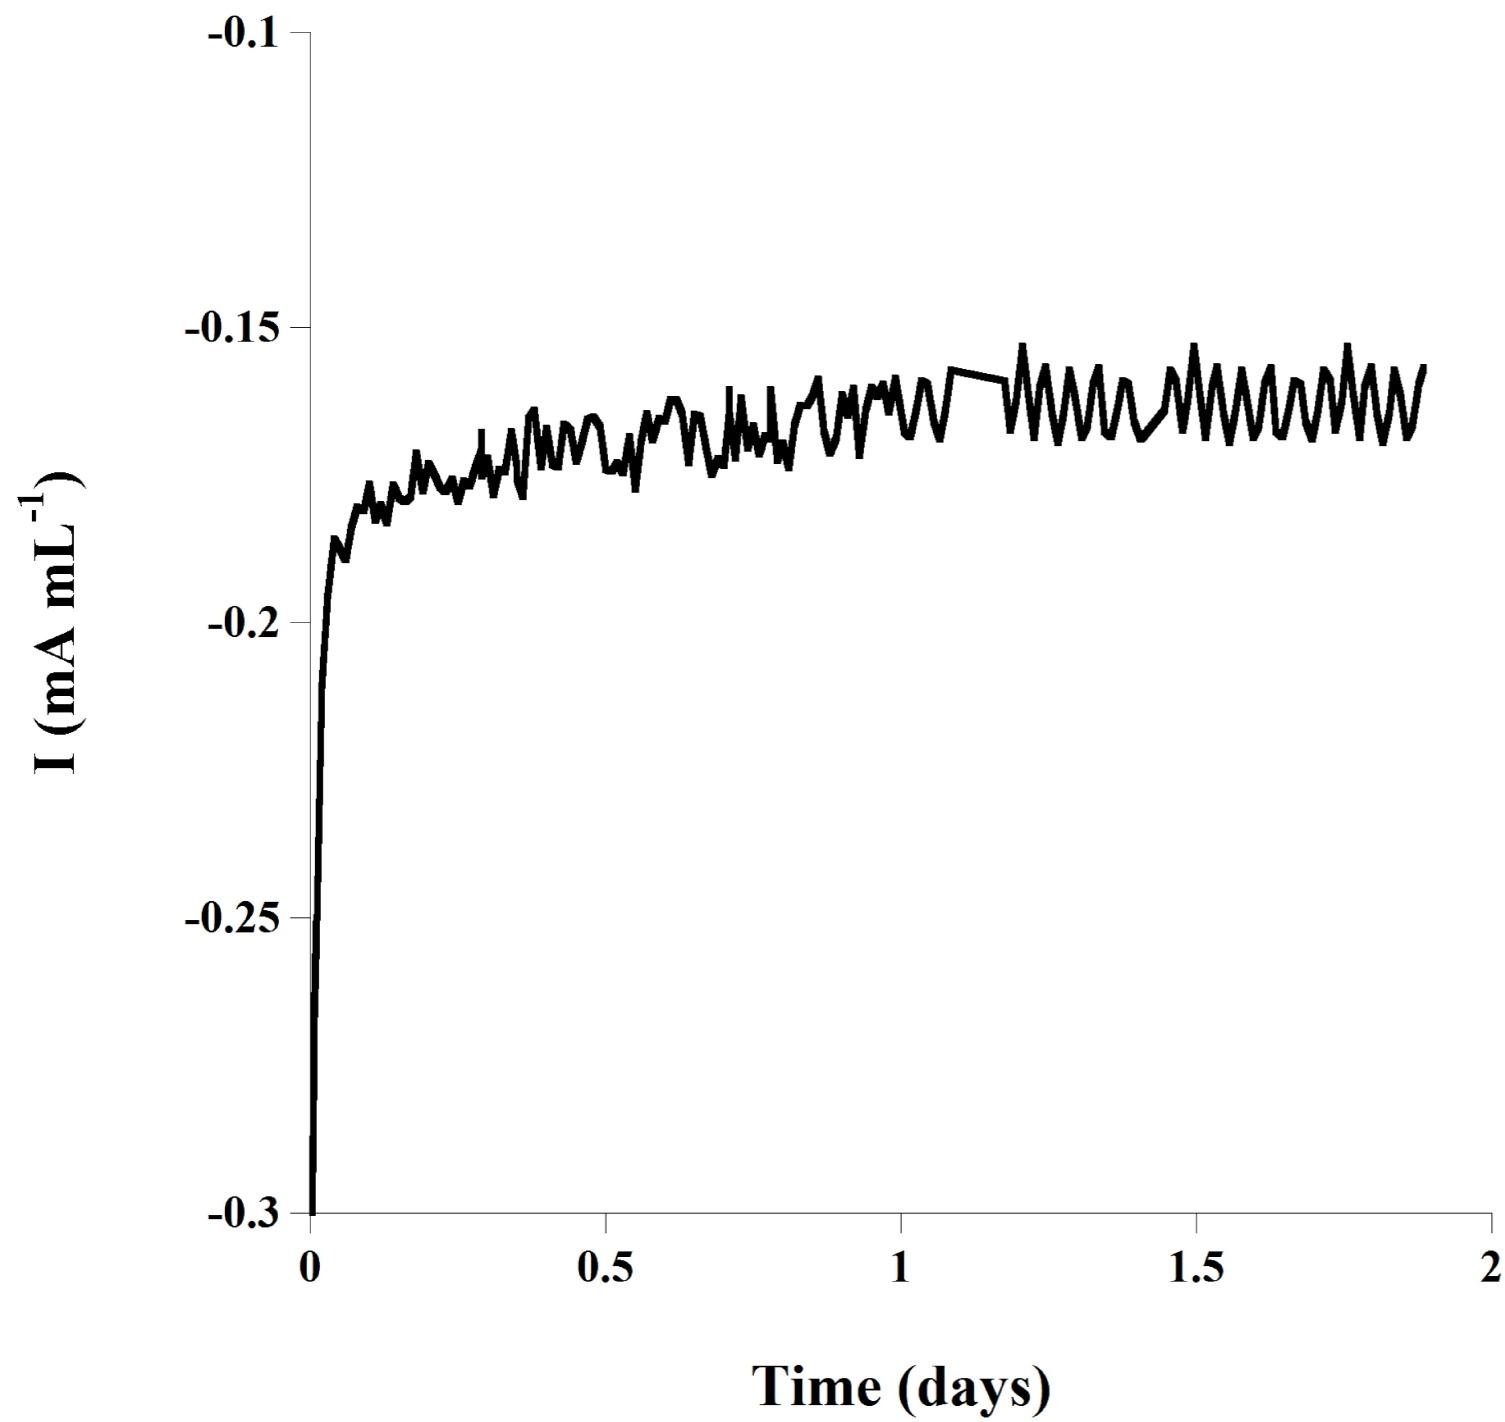

Supplement: c4cc04862h8.pdf [file c4cc04862h8.pdf]
